# Supplementary material for: Synthesis of a precursor of D-fagomine by immobilized fructose-6-phosphate aldolase
Source: PLOS journal article supplement (doi:10.1371/journal.pone.0250513), 2021-04-22
Supplement: S3 (10.1371/journal.pone.0250513.s003) [file journal.pone.0250513.s003]

### Activity test (HPLC)

This test consists in the target aldol addition of DHA to  $\beta$ -CHO catalyzed by FSA, measuring the formation of preFagomine on HPLC. This test shows great linearity at within the experimental range of FSA concentration.

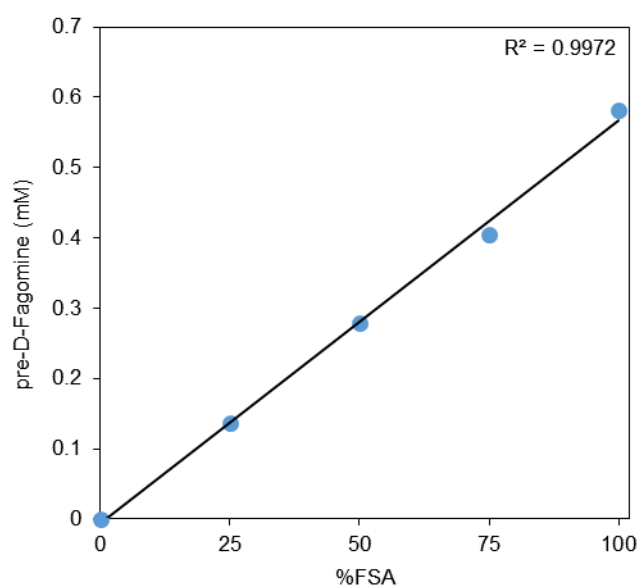

**S3 Fig.** The relation between percentage of FSA activity and product formation in the activity test of the DHA aldol addition to  $\beta$ -CHO. %FSA stands for the initial active amount of FSA used in the screening of FSA onto mNC ( $0.02 \text{ U ml}^{-1}$ ).
